# Supplementary material for: A 3D‐Engineered Conformal Implant Releases DNA Nanocomplexs for Eradicating the Postsurgery Residual Glioblastoma
Source: PubMed Central journal article supplement (PMC5566247; doi:10.1002/advs.201600491), 2017-03-30

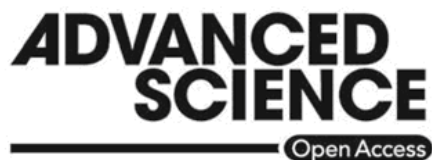

## Supporting Information

for *Adv. Sci.*, DOI: 10.1002/adv.201600491

**A 3D-Engineered Conformal Implant Releases DNA  
Nanocomplexes for Eradicating the Postsurgery Residual  
Glioblastoma**

*Yuan Yang, Ting Du, Jiumeng Zhang, Tianyi Kang, Li Luo, Jie  
Tao, Zhiyuan Gou, Shaochen Chen, Yanan Du, Jiankang He,  
Shu Jiang, Qing Mao,\* and Maling Gou\**

## Supporting Information

**Supporting Figure 1.** a. Size distribution spectrum of HPEI nanogels; b. zeta potential spectrum of HPEI nanogels; c. the DNA-binding ability of HPEI nanogels as determined by a gel retardation assay; d. fluorescence image of U87 cells incubated with F127-HPEI-GFP (10:1); e. confocal microscopy image of U87 cells after 3D culture; f. SEM image of U87 cells after 2D culture.

Sup. Figure 1.

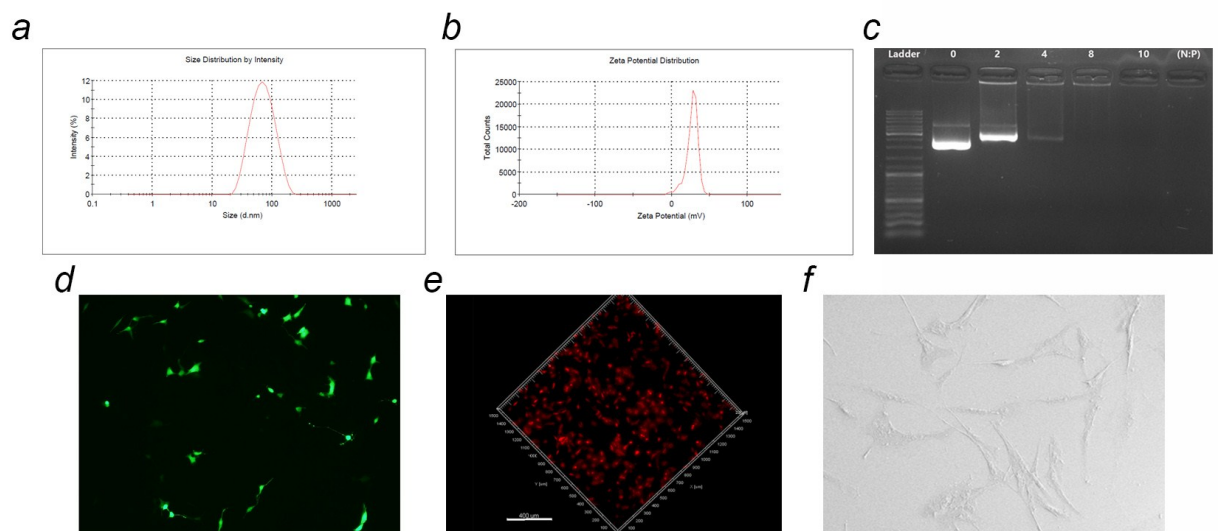

Supplement: ADVS-4-na-s001.pdf [file ADVS-4-na-s001.pdf]
